# Supplementary material for: Longitudinal effect of nocturnal R-R intervals changes on cardiovascular outcome in a community-based cohort
Source: PubMed Central journal article supplement — BMJ Open. 2019 Jul 17;9(7):e030559. doi: 10.1136/bmjopen-2019-030559 (PMC6661586; doi:10.1136/bmjopen-2019-030559), 2019-07-17
Supplement: bmjopen-2019-030559supp001.pdf [file bmjopen-2019-030559supp001.pdf]

## Supplements Materials:

### Analysis supplement:

**Table 1S.** Medications were taken by individuals excluded due to the potential effect on heart rate.

|                                                             |
|-------------------------------------------------------------|
| Medication name (Brand)                                     |
| Metoprolol tartrate (Lopressor, nebivolol)                  |
| Enalapril maleate (Vasotec)                                 |
| Nadolol (Corgard)                                           |
| Atenolol (Tenormin, Zebeta)                                 |
| Betaxolol hydrochloride (Kerlone)                           |
| Acebutolol hydrochloride (Sectral)                          |
| Clonidine (Catapres, other alpha adrenergic agonist agents) |
| Atenolol & Chlorthalidone (Tenoretic)                       |
| Metoprolol succinate (Toprol XL)                            |
| Diazac                                                      |
| Labetalol Hydrochloride (Normodyne, Tradate)                |
| Betachron (Propranolol)                                     |
| Ziac (Hydrochlorothiazide / Bisoprolol combo)               |
| Carvediol (Coreg, Cartrol)                                  |
| Pindolol (Visken)                                           |
| Diltiazem HCL (Cardizem, Dilacor, Taztia XT, Tiazac)        |
| Amiodarone HCl (Cordarone, tikosyn)                         |
